# Supplementary material for: Intracellular Bacillary Burden Reflects a Burst Size for Mycobacterium tuberculosis In Vivo
Source: PubMed Central journal article supplement (PMC3578792; doi:10.1371/journal.ppat.1003190), 2013-02-21

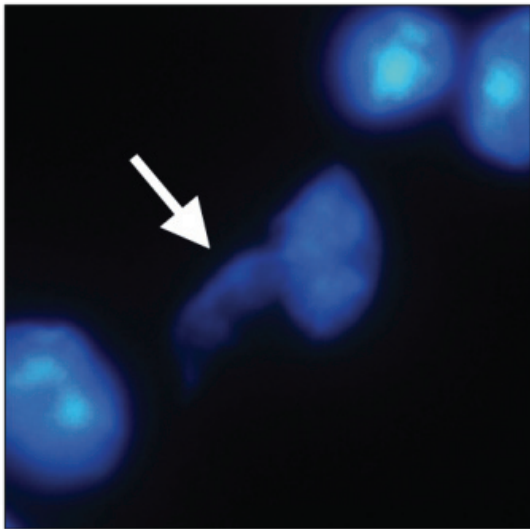

Supplement: ppat.1003190.s005.pdf [file ppat.1003190.s005.pdf]
